# Supplementary material for: Effective bandgap engineering in wrinkled germanane via tiny electric field
Source: Royal Society of Chemistry journal article supplement (doi:10.1039/c3tc32084g), 2013-11-28
Supplement: c3tc32084g.pdf [file c3tc32084g.pdf]

### Supporting information for

### Effective Bandgap Engineering in Wrinkled Germanane via Tiny Electric Field

Yandong Ma, Ying Dai\*, Ying-Bo Lu, and Baibiao Huang

School of Physics, State Key Laboratory of Crystal Materials, Shandong University,

Jinan 250100, People's Republic of China

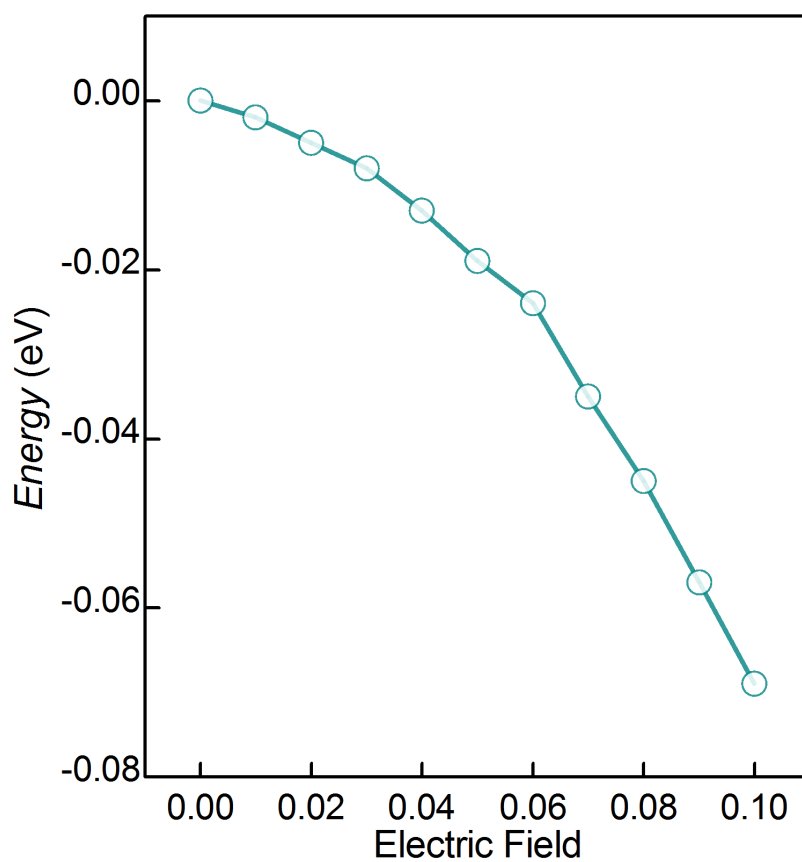

**Figure 1S.** The energy difference between the wrinkled germanane with and without E-field as a function of applied E-field

### Structural and energy information of wrinkled germanane

| H                  | Ge |                   |                    |
|--------------------|----|-------------------|--------------------|
| 1.0                |    |                   |                    |
| 92.26578999999996  |    | 0.000000000000000 | 0.000000000000000  |
| 0.000000000000000  |    | 3.985920000000000 | 0.000000000000000  |
| 0.000000000000000  |    | 0.000000000000000 | 44.000000000000000 |
| 60                 | 60 |                   |                    |
| Direct             |    |                   |                    |
| 0.7553100000000003 |    | 0.000000000000000 | 0.183120000000000  |
| 0.782579999999999  |    | 0.000000000000000 | 0.267190000000000  |
| 0.8250200000000002 |    | 0.000000000000000 | 0.164580000000000  |
| 0.8603500000000002 |    | 0.000000000000000 | 0.234150000000000  |
| 0.891130000000000  |    | 0.000000000000000 | 0.114620000000000  |
| 0.9326400000000003 |    | 0.000000000000000 | 0.167070000000000  |
| 0.950260000000000  |    | 0.000000000000000 | 0.036950000000000  |
| 0.9962700000000002 |    | 0.000000000000000 | 0.068520000000000  |
| 0.7032900000000001 |    | 0.000000000000000 | 0.264180000000000  |
| 0.6852400000000001 |    | 0.000000000000000 | 0.169770000000000  |
| 0.6261600000000001 |    | 0.000000000000000 | 0.225650000000000  |
| 0.6183500000000001 |    | 0.000000000000000 | 0.125250000000000  |
| 0.5550400000000002 |    | 0.000000000000000 | 0.153260000000000  |
| 0.5578000000000001 |    | 0.000000000000000 | 0.051760000000000  |
| 0.506330000000000  |    | 0.000000000000000 | 0.9509600000000001 |
| 0.2446900000000001 |    | 0.000000000000000 | 0.8168800000000001 |
| 0.2174200000000001 |    | 0.000000000000000 | 0.7328100000000002 |
| 0.174980000000000  |    | 0.000000000000000 | 0.8354200000000002 |
| 0.139650000000000  |    | 0.000000000000000 | 0.765850000000000  |
| 0.108870000000000  |    | 0.000000000000000 | 0.885379999999999  |
| 0.067360000000000  |    | 0.000000000000000 | 0.8329300000000001 |
| 0.049740000000000  |    | 0.000000000000000 | 0.9630500000000001 |
| 0.003730000000000  |    | 0.000000000000000 | 0.9314800000000001 |
| 0.296710000000000  |    | 0.000000000000000 | 0.7358200000000003 |
| 0.314760000000000  |    | 0.000000000000000 | 0.8302300000000001 |
| 0.3738400000000001 |    | 0.000000000000000 | 0.774350000000000  |
| 0.381650000000000  |    | 0.000000000000000 | 0.8747500000000001 |
| 0.4449600000000001 |    | 0.000000000000000 | 0.8467400000000002 |
| 0.4422000000000001 |    | 0.000000000000000 | 0.9482400000000001 |
| 0.493670000000000  |    | 0.000000000000000 | 0.049040000000000  |
| 0.7428800000000002 |    | 0.500000000000000 | 0.270260000000000  |

|                    |                    |                    |
|--------------------|--------------------|--------------------|
| 0.7904900000000000 | 0.5000000000000000 | 0.1777500000000000 |
| 0.8218500000000001 | 0.5000000000000000 | 0.2552800000000000 |
| 0.8587500000000001 | 0.5000000000000000 | 0.1432400000000000 |
| 0.8973700000000000 | 0.5000000000000000 | 0.2046400000000000 |
| 0.9219300000000001 | 0.5000000000000000 | 0.0789100000000000 |
| 0.9657900000000000 | 0.5000000000000000 | 0.1219200000000000 |
| 0.9765500000000001 | 0.5000000000000000 | 0.9874099999999999 |
| 0.7201700000000001 | 0.5000000000000000 | 0.1803600000000000 |
| 0.6641900000000003 | 0.5000000000000000 | 0.2493000000000000 |
| 0.6511600000000001 | 0.5000000000000000 | 0.1513100000000000 |
| 0.5896000000000001 | 0.5000000000000000 | 0.1933500000000000 |
| 0.5870500000000001 | 0.5000000000000000 | 0.0918100000000000 |
| 0.5224500000000001 | 0.5000000000000000 | 0.1044800000000000 |
| 0.4684100000000001 | 0.5000000000000000 | 0.9953000000000000 |
| 0.2571200000000000 | 0.5000000000000000 | 0.7297400000000002 |
| 0.2095100000000001 | 0.5000000000000000 | 0.8222500000000000 |
| 0.1781500000000000 | 0.5000000000000000 | 0.7447200000000002 |
| 0.1412500000000000 | 0.5000000000000000 | 0.8567600000000001 |
| 0.1026300000000000 | 0.5000000000000000 | 0.7953600000000001 |
| 0.0780700000000000 | 0.5000000000000000 | 0.9210900000000001 |
| 0.0342100000000000 | 0.5000000000000000 | 0.8780800000000002 |
| 0.0234500000000000 | 0.5000000000000000 | 0.0125900000000000 |
| 0.2798300000000000 | 0.5000000000000000 | 0.8196400000000003 |
| 0.3358100000000002 | 0.5000000000000000 | 0.7507000000000001 |
| 0.3488400000000000 | 0.5000000000000000 | 0.8486900000000002 |
| 0.4104000000000000 | 0.5000000000000000 | 0.8066500000000001 |
| 0.4129500000000000 | 0.5000000000000000 | 0.9081900000000001 |
| 0.4775500000000000 | 0.5000000000000000 | 0.8955200000000000 |
| 0.5315900000000000 | 0.5000000000000000 | 0.0047000000000000 |
| 0.5481100000000001 | 0.0000000000000000 | 0.0806000000000000 |
| 0.5642200000000001 | 0.0000000000000000 | 0.1237400000000000 |
| 0.6118900000000002 | 0.0000000000000000 | 0.1578300000000000 |
| 0.6822700000000000 | 0.0000000000000000 | 0.2045000000000000 |
| 0.6321100000000001 | 0.0000000000000000 | 0.1926900000000000 |
| 0.7056500000000001 | 0.0000000000000000 | 0.2292800000000000 |
| 0.7559200000000002 | 0.0000000000000000 | 0.2183800000000001 |
| 0.8292500000000000 | 0.0000000000000000 | 0.1987300000000000 |
| 0.7813000000000002 | 0.0000000000000000 | 0.2320600000000000 |
| 0.8554200000000002 | 0.0000000000000000 | 0.2004700000000000 |
| 0.8986800000000003 | 0.0000000000000000 | 0.1461500000000000 |
| 0.9609599999999999 | 0.0000000000000000 | 0.0641600000000000 |
| 0.9244100000000000 | 0.0000000000000000 | 0.1363600000000000 |
| 0.9849400000000002 | 0.0000000000000000 | 0.0425100000000000 |
| 0.4942400000000000 | 0.0000000000000000 | 0.9754499999999999 |

|                    |                    |                    |
|--------------------|--------------------|--------------------|
| 0.4518900000000000 | 0.0000000000000000 | 0.9194000000000001 |
| 0.4357800000000001 | 0.0000000000000000 | 0.8762600000000002 |
| 0.3881100000000001 | 0.0000000000000000 | 0.8421700000000001 |
| 0.3177300000000000 | 0.0000000000000000 | 0.7955000000000001 |
| 0.3678900000000001 | 0.0000000000000000 | 0.8073100000000000 |
| 0.2943500000000001 | 0.0000000000000000 | 0.7707200000000001 |
| 0.2440800000000001 | 0.0000000000000000 | 0.7816200000000001 |
| 0.1707500000000000 | 0.0000000000000000 | 0.8012700000000002 |
| 0.2187000000000000 | 0.0000000000000000 | 0.7679400000000001 |
| 0.1445800000000000 | 0.0000000000000000 | 0.7995300000000000 |
| 0.1013200000000000 | 0.0000000000000000 | 0.8538600000000000 |
| 0.0390400000000000 | 0.0000000000000000 | 0.9358400000000002 |
| 0.0755900000000000 | 0.0000000000000000 | 0.8636400000000002 |
| 0.0150600000000000 | 0.0000000000000000 | 0.9574900000000002 |
| 0.5057600000000000 | 0.0000000000000000 | 0.0245500000000000 |
| 0.5789700000000002 | 0.5000000000000000 | 0.1227600000000000 |
| 0.5334300000000001 | 0.5000000000000000 | 0.0778200000000000 |
| 0.5972599999999999 | 0.5000000000000000 | 0.1619800000000000 |
| 0.6464500000000001 | 0.5000000000000000 | 0.1851900000000000 |
| 0.7189300000000003 | 0.5000000000000000 | 0.2155500000000001 |
| 0.6683800000000001 | 0.5000000000000000 | 0.2151700000000000 |
| 0.7434300000000000 | 0.5000000000000000 | 0.2350400000000000 |
| 0.7928700000000001 | 0.5000000000000000 | 0.2126800000000000 |
| 0.8646600000000003 | 0.5000000000000000 | 0.1762700000000000 |
| 0.8187800000000002 | 0.5000000000000000 | 0.2206400000000000 |
| 0.8907600000000002 | 0.5000000000000000 | 0.1722600000000000 |
| 0.9309500000000002 | 0.5000000000000000 | 0.1086700000000000 |
| 0.9883800000000000 | 0.5000000000000000 | 0.0124700000000000 |
| 0.9560200000000002 | 0.5000000000000000 | 0.0932500000000000 |
| 0.4798000000000002 | 0.5000000000000000 | 0.9693599999999999 |
| 0.4210300000000001 | 0.5000000000000000 | 0.8772400000000001 |
| 0.4665700000000000 | 0.5000000000000000 | 0.9221800000000000 |
| 0.4027400000000000 | 0.5000000000000000 | 0.8380200000000001 |
| 0.3535500000000000 | 0.5000000000000000 | 0.8148100000000002 |
| 0.2810700000000000 | 0.5000000000000000 | 0.7844500000000000 |
| 0.3316200000000001 | 0.5000000000000000 | 0.7848300000000000 |
| 0.2565700000000000 | 0.5000000000000000 | 0.7649600000000000 |
| 0.2071300000000000 | 0.5000000000000000 | 0.7873200000000000 |
| 0.1353400000000000 | 0.5000000000000000 | 0.8237300000000001 |
| 0.1812200000000000 | 0.5000000000000000 | 0.7793600000000001 |
| 0.1092400000000000 | 0.5000000000000000 | 0.8277400000000003 |
| 0.0690500000000000 | 0.5000000000000000 | 0.8913300000000000 |
| 0.0116200000000000 | 0.5000000000000000 | 0.9875299999999999 |
| 0.0439800000000000 | 0.5000000000000000 | 0.9067500000000002 |

0.5202000000000001

0.5000000000000000

0.0306400000000000
